# Supplementary material for: Assessment and classification of peripheral pain in athletes: a scoping review protocol
Source: PubMed Central journal article supplement — BMJ Open Sport Exerc Med. 2021 Dec 30;7(4):e001215. doi: 10.1136/bmjsem-2021-001215 (PMC8719172; doi:10.1136/bmjsem-2021-001215), 2021-12-30
Supplement: bmjsem-2021-001215supp001.pdf [file bmjsem-2021-001215supp001.pdf]

## Appendix I: Search strategy

Medline (Pubmed) Search conducted on 15<sup>th</sup> August 2021

| Search | Query                                                                                                                                                                                                                                                                                                                                                                                                                                                                                                                                                                                                                                                                                                                                                                                                                                                                                                                                                                                                                                                                                                                                                                                                                                                                                                                                                                                                                                                                                                                                                                                                                                                                                                                                                                                                                                                                                                                                                                                                                                                                                                              | Records retrieved |
|--------|--------------------------------------------------------------------------------------------------------------------------------------------------------------------------------------------------------------------------------------------------------------------------------------------------------------------------------------------------------------------------------------------------------------------------------------------------------------------------------------------------------------------------------------------------------------------------------------------------------------------------------------------------------------------------------------------------------------------------------------------------------------------------------------------------------------------------------------------------------------------------------------------------------------------------------------------------------------------------------------------------------------------------------------------------------------------------------------------------------------------------------------------------------------------------------------------------------------------------------------------------------------------------------------------------------------------------------------------------------------------------------------------------------------------------------------------------------------------------------------------------------------------------------------------------------------------------------------------------------------------------------------------------------------------------------------------------------------------------------------------------------------------------------------------------------------------------------------------------------------------------------------------------------------------------------------------------------------------------------------------------------------------------------------------------------------------------------------------------------------------|-------------------|
| #1     | "Peripheral Pain"[Title/Abstract] OR "Leg Pain"[Title/Abstract] OR "Arm Pain"[Title/Abstract] OR "Hip Pain"[Title/Abstract] OR "Shoulder Pain"[Title/Abstract] OR "Knee Pain"[Title/Abstract] OR "Foot Pain"[Title/Abstract] OR "Ankle Pain"[Title/Abstract] OR "Hamstring Pain"[Title/Abstract] OR "Calf Pain"[Title/Abstract] OR "Quadriceps Pain"[Title/Abstract] OR "Elbow Pain"[Title/Abstract] OR "Wrist Pain"[Title/Abstract] OR "Finger Pain"[Title/Abstract] OR "Toe Pain"[Title/Abstract] OR "Gluteal Pain"[Title/Abstract] OR "Rotator Cuff Pain"[Title/Abstract] OR "Biceps Pain"[Title/Abstract] OR "Tendon Pain"[Title/Abstract] OR "Muscle Pain"[Title/Abstract] OR "Muscle Soreness"[Title/Abstract] OR "Musculoskeletal Pain"[Title/Abstract] OR "Acute Pain"[Title/Abstract] OR "Chronic Pain"[Title/Abstract] OR "Nociceptive Pain"[Title/Abstract] OR "Inflammatory Pain"[Title/Abstract] OR "Neuropathic Pain"[Title/Abstract] OR "Nociplastic Pain"[Title/Abstract] OR "Affective Pain"[Title/Abstract] OR "Central Sensitisation"[Title/Abstract] OR "Central Sensitization"[Title/Abstract] OR "Peripheral Sensitisation"[Title/Abstract] OR "Peripheral Sensitization"[Title/Abstract] OR "Ischaemic Pain"[Title/Abstract] OR "Referred Pain"[Title/Abstract] OR "Postoperative Pain"[Title/Abstract] OR "Neuralgia"[Title/Abstract] OR "Arthralgia"[Title/Abstract] OR "Myalgia"[Title/Abstract] OR "pain catastrophis*"[Title/Abstract] OR "pain catastrophiz*"[Title/Abstract] OR "Metatarsalgia"[Title/Abstract] OR "Patellofemoral Pain Syndrome"[Title/Abstract] OR "complex regional pain syndrome*"[Title/Abstract] OR "limb pain"[Title/Abstract] OR "myofascial pain"[Title/Abstract] OR "inguinal pain"[Title/Abstract] OR "Musculoskeletal Pain"[Mesh] OR "Acute Pain"[Mesh] OR "Chronic Pain"[Mesh] OR "Nociceptive Pain"[Mesh] OR "Pain, Referred"[Mesh] OR "Pain, Postoperative"[Mesh] OR "Neuralgia"[Mesh] OR "Arthralgia"[Mesh] OR "Catastrophization"[Mesh] OR "Metatarsalgia"[Mesh] OR "Patellofemoral Pain Syndrome"[Mesh] OR "Complex Regional Pain Syndromes"[Mesh] | 147,433           |
| #2     | "Back Pain"[Title/Abstract] OR "Low Back Pain"[Title/Abstract] OR "Chronic Low Back Pain"[Title/Abstract] OR "Thoracic Pain"[Title/Abstract] OR "Chest Pain"[Title/Abstract] OR "Abdominal Pain"[Title/Abstract] OR "Neck Pain"[Title/Abstract] OR "Headache"[Title/Abstract] OR "Cervical Pain"[Title/Abstract] OR "lumbar pain"[Title/Abstract] OR "Sciatica"[Title/Abstract] OR "Neck Ache"[Title/Abstract] OR "Back Ache"[Title/Abstract] OR "backache"[Title/Abstract] OR "Spinal Pain"[Title/Abstract] OR "Lumbago"[Title/Abstract] OR "Facet Joint Pain"[Title/Abstract] OR "Facet Pain"[Title/Abstract] OR "Disc Pain"[Title/Abstract] OR "Pelvic Pain"[Title/Abstract] OR "thorax pain"[Title/Abstract] OR "Back Pain"[Mesh] OR "Neck Pain"[Mesh] OR "Chest Pain"[Mesh] OR "Abdominal Pain"[Mesh]                                                                                                                                                                                                                                                                                                                                                                                                                                                                                                                                                                                                                                                                                                                                                                                                                                                                                                                                                                                                                                                                                                                                                                                                                                                                                                         | 211,294           |
| #3     | #1 NOT #2                                                                                                                                                                                                                                                                                                                                                                                                                                                                                                                                                                                                                                                                                                                                                                                                                                                                                                                                                                                                                                                                                                                                                                                                                                                                                                                                                                                                                                                                                                                                                                                                                                                                                                                                                                                                                                                                                                                                                                                                                                                                                                          | 125,820           |

|                                                         |                                                                                                                                                                                                                                                                                                                                                                                                                                                                                                                                                                                                                                                                                                                                                                                                                                                                                                                                                                                                                                                                                                                                                                                                                                                                                                                                                                                                                                                                                                                                                                                                                                                                                                                                                                                                                                                                                                                                                                         |         |
|---------------------------------------------------------|-------------------------------------------------------------------------------------------------------------------------------------------------------------------------------------------------------------------------------------------------------------------------------------------------------------------------------------------------------------------------------------------------------------------------------------------------------------------------------------------------------------------------------------------------------------------------------------------------------------------------------------------------------------------------------------------------------------------------------------------------------------------------------------------------------------------------------------------------------------------------------------------------------------------------------------------------------------------------------------------------------------------------------------------------------------------------------------------------------------------------------------------------------------------------------------------------------------------------------------------------------------------------------------------------------------------------------------------------------------------------------------------------------------------------------------------------------------------------------------------------------------------------------------------------------------------------------------------------------------------------------------------------------------------------------------------------------------------------------------------------------------------------------------------------------------------------------------------------------------------------------------------------------------------------------------------------------------------------|---------|
| #4                                                      | Athlet*[Title/Abstract] OR Sportsperson*[Title/Abstract] OR Sportsm*[Title/Abstract] OR "Elite Athlete*[Title/Abstract] OR "Professional Athlete*[Title/Abstract] OR "Competitive Athlete*[Title/Abstract] OR "Semi-Professional Athlete*[Title/Abstract] OR Footballer*[Title/Abstract] OR Swimmer*[Title/Abstract] OR Rower*[Title/Abstract] OR Sailor*[Title/Abstract] OR Runner*[Title/Abstract] OR Golfer*[Title/Abstract] OR Cyclist*[Title/Abstract] OR Weightlifter*[Title/Abstract] OR Olympian*[Title/Abstract] OR Powerlifter*[Title/Abstract] OR canoeist*[Title/Abstract] OR Player*[Title/Abstract] OR Sport*[Title/Abstract] OR Thrower* [Title/Abstract] OR Jumper* [Title/Abstract] OR Baller* [Title/Abstract] OR "Athletes"[Mesh] OR "Sports"[Mesh]                                                                                                                                                                                                                                                                                                                                                                                                                                                                                                                                                                                                                                                                                                                                                                                                                                                                                                                                                                                                                                                                                                                                                                                                  | 214,750 |
| #5                                                      | "Pain Assessment"[Title/Abstract] OR "Pain Measurement"[Title/Abstract] OR "Pain Classification"[Title/Abstract] OR "Pain scales"[Title/Abstract] OR "Pain Domains"[Title/Abstract] OR "Pain States"[Title/Abstract] OR "Pain factors"[Title/Abstract] OR "Pain risk factors"[Title/Abstract] OR "pain predic*[Title/Abstract] OR "Quantitative Sensory Testing"[Title/Abstract] OR "Visual Analogue Scale"[Title/Abstract] OR "Numerical Pain Rating Scale"[Title/Abstract] OR "PainDetect"[Title/Abstract] OR "Pain Perception"[Title/Abstract] OR "Perceived Pain"[Title/Abstract] OR "Pain Threshold"[Title/Abstract] OR "Pain Modulation"[Title/Abstract] OR "Pain location"[Title/Abstract] OR "pain map*[Title/Abstract] OR "pressure pain*[Title/Abstract] OR "Pain Evaluation"[Title/Abstract] OR "Pressure Algometry"[Title/Abstract] OR "Pain Characteristics"[Title/Abstract] OR "international classification of functioning disability and health"[Title/Abstract] OR "International Classification of Diseases"[Title/Abstract] OR "Assess Pain"[Title/Abstract] OR "Measure Pain"[Title/Abstract] OR "Evaluate Pain"[Title/Abstract] OR "Pain Experience"[Title/Abstract] OR "Pain Questionnaires"[Title/Abstract] OR "Pain forms"[Title/Abstract] OR "Pain scores"[Title/Abstract] OR "Pain tools"[Title/Abstract] OR "Pain adjectives"[Title/Abstract] OR "Pain description"[Title/Abstract] OR "Pain History"[Title/Abstract] OR "History of pain"[Title/Abstract] OR "Pain interview"[Title/Abstract] OR "Stiffness"[Title/Abstract] OR "Tenderness"[Title/Abstract] OR "Perceived Soreness"[Title/Abstract] OR "Pain Severity"[Title/Abstract] OR "Pain Survey"[Title/Abstract] OR "Survey of Pain"[Title/Abstract] OR "Experience of Pain"[Title/Abstract] OR "Quantify Pain"[Title/Abstract] OR "symptom assessment"[Title/Abstract] "Pain Measurement"[Mesh] OR "Pain Perception"[Mesh] OR "Pain Threshold"[Mesh] OR "Symptom Assessment"[Mesh] | 177,321 |
| #6                                                      | #3 AND #4 AND #5                                                                                                                                                                                                                                                                                                                                                                                                                                                                                                                                                                                                                                                                                                                                                                                                                                                                                                                                                                                                                                                                                                                                                                                                                                                                                                                                                                                                                                                                                                                                                                                                                                                                                                                                                                                                                                                                                                                                                        | 1398    |
| Limited to: English language, Humans, Journal Articles. |                                                                                                                                                                                                                                                                                                                                                                                                                                                                                                                                                                                                                                                                                                                                                                                                                                                                                                                                                                                                                                                                                                                                                                                                                                                                                                                                                                                                                                                                                                                                                                                                                                                                                                                                                                                                                                                                                                                                                                         |         |

## Appendix II: Data Charting Tool

| <b>Study Data Charting Tool</b>                                      |  |
|----------------------------------------------------------------------|--|
| <b>Evidence Source Details and Characteristics</b>                   |  |
| Citation Details (authors, date, title)                              |  |
| Country/region                                                       |  |
| Context (field, research, clinical)                                  |  |
| Study Design                                                         |  |
| Study Aims<br>(Pain assessment or classification aims)               |  |
| Study Limitations<br>(Pain assessment or classification limitations) |  |
| Participants demographics (age sex, number)                          |  |
| Sport/competition (type of sport and level)                          |  |
| Pain area/region (e.g. hip, ankle, knee, etc)                        |  |
| <b>Peripheral Athlete Pain Details</b>                               |  |
| Pain measures used (sensory/emotional)                               |  |
| Other measures used (psychological/physical)                         |  |
| Pain classification system used                                      |  |
| Pain definition used                                                 |  |
| Diagnosis included (case studies)                                    |  |
| Referral information included (case studies)                         |  |
